# Supplementary material for: The enhanced dissociation and associated surface structure of the anesthetic propofol at the water interface: vibrational sum frequency generation study
Source: Royal Society of Chemistry journal article supplement (doi:10.1039/d1cp02838c), 2021-01-01
Supplement: d1cp02838c1.pdf [file d1cp02838c1.pdf]

## Supporting Information

### **The Enhanced Dissociation and Associated Surface Structure of Anesthetic Propofol at the Water Interface: Vibrational Sum Frequency Generation Study**

Biswajit Biswas, Prashant Chandra Singh\*

School of Chemical Sciences

Indian Association for the Cultivation of Sciences,

Kolkata, West Bengal, India 700032

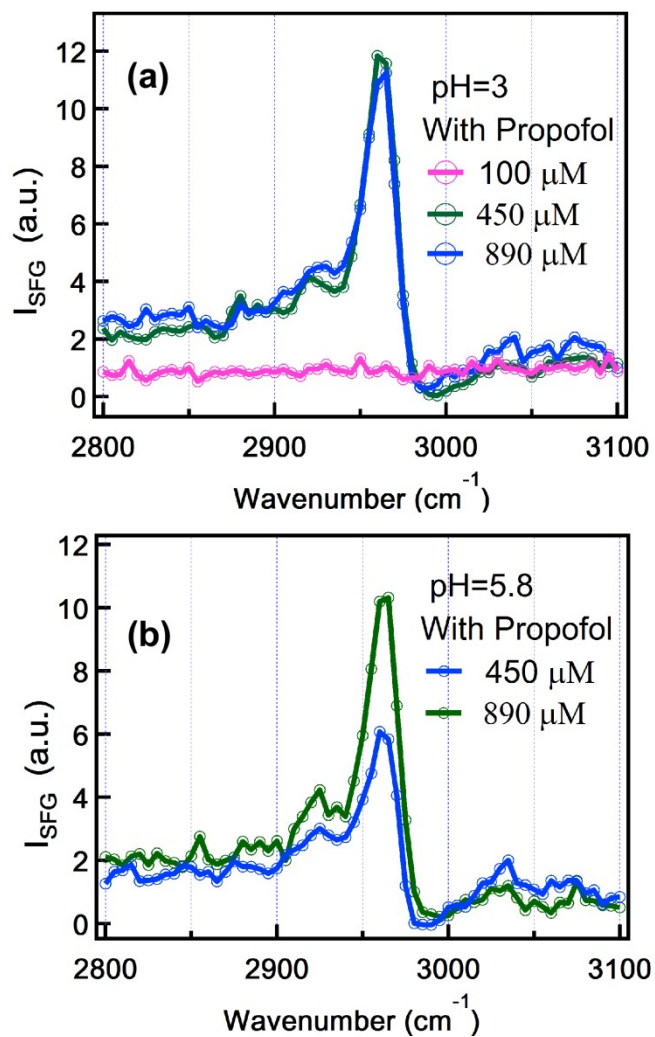

**Figure S1:** The PPP polarized VSFG spectra of the C-H stretch of propofol at pH 3 (a) and 5.8 (b), respectively.

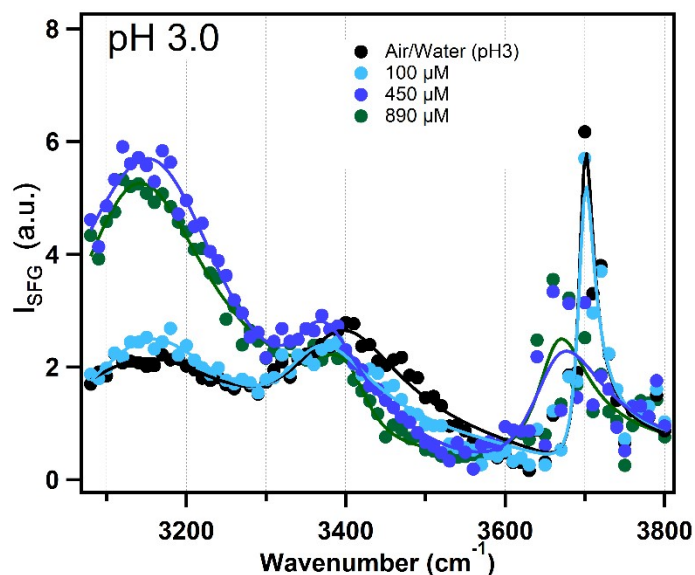

**Figure S2:** SSP polarized SFG spectra of water OH region at different concentrations of propofol at pH 3.0 along with fitted line (solid) using Lorentzian equation.

**Table S1:** The peak center, amplitude (A), and peak width ( $\Gamma$ ) values of SFG spectra different concentrations of propofol at pH 3.0, obtained from the fittings with equation 3.

| Sample                                             | Peak Center (cm <sup>-1</sup> ) | Amplitude (A)     | Width ( $\Gamma$ ) |
|----------------------------------------------------|---------------------------------|-------------------|--------------------|
| <b><u>Propofol (<math>\mu</math>M) at pH 3</u></b> |                                 |                   |                    |
| <b>0</b>                                           | 3148 $\pm$ 14.8                 | 154.04 $\pm$ 59.5 | 153.2 $\pm$ 46.    |
|                                                    | 3387 $\pm$ 9                    | 73.913 $\pm$ 26.6 | 85.80 $\pm$ 18.8   |
|                                                    | 3698 $\pm$ 1.38                 | 20.334 $\pm$ 2.09 | 11.46 $\pm$ 1.07   |
| <b>100</b>                                         | 3149 $\pm$ 10.4                 | 134.06 $\pm$ 36.7 | 120.5 $\pm$ 25.2   |
|                                                    | 3360 $\pm$ 9.39                 | 48.756 $\pm$ 19.1 | 71.38 $\pm$ 19.2   |
|                                                    | 3698 $\pm$ 1.61                 | 20.752 $\pm$ 2.32 | 12.61 $\pm$ 1.35   |
| <b>450</b>                                         | 3160 $\pm$ 13.5                 | 294.86 $\pm$ 53   | 130.2 $\pm$ 12.6   |
|                                                    | 3363 $\pm$ 11                   | 39.203 $\pm$ 23.1 | 56.18 $\pm$ 20.9   |
|                                                    | 3658 $\pm$ 13.4                 | 57.26 $\pm$ 17    | 54.89 $\pm$ 12.1   |
| <b>890</b>                                         | 3130 $\pm$ 9.78                 | 208.07 $\pm$ 29.5 | 111.0 $\pm$ 13.5   |
|                                                    | 3409 $\pm$ 10                   | 21.014 $\pm$ 10.4 | 41.4 $\pm$ 16.9    |
|                                                    | 3661 $\pm$ 7.66                 | 37.717 $\pm$ 10.1 | 38.8 $\pm$ 8.6     |

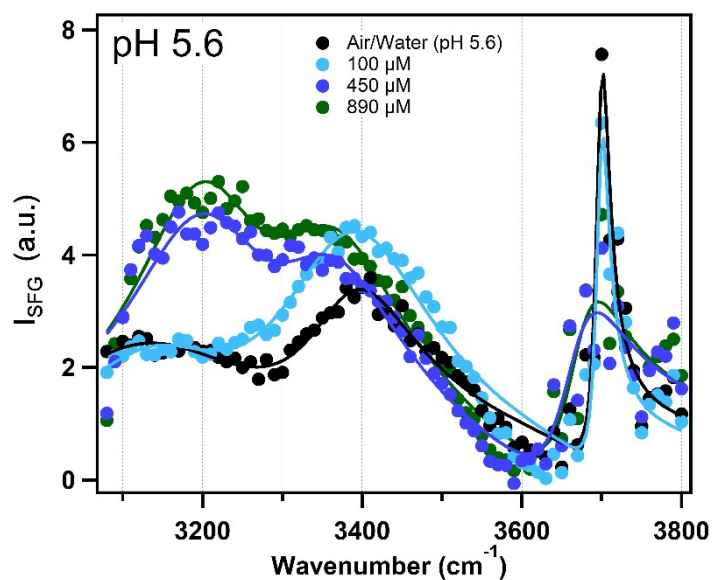

**Figure S3:** SSP polarized SFG spectra of water OH region at different concentrations of propofol at pH 5.6 along with fitted line (solid) using Lorentzian equation.

**Table S2:** The peak center, amplitude (A), and peak width ( $\Gamma$ ) values of SFG spectra different concentrations of propofol at pH 5.6, obtained from the fittings with equation 3.

| Sample                                               | Peak Center (cm <sup>-1</sup> ) | Amplitude (A)    | Width ( $\Gamma$ ) |
|------------------------------------------------------|---------------------------------|------------------|--------------------|
| <b><u>Propofol (<math>\mu</math>M) at pH 5.8</u></b> |                                 |                  |                    |
| <b>0</b>                                             | 3124 $\pm$ 24.2                 | 207.3 $\pm$ 107  | 183.7 $\pm$ 73.6   |
|                                                      | 3383 $\pm$ 8.37                 | 83.7 $\pm$ 29.8  | 87.6 $\pm$ 17.9    |
|                                                      | 3698 $\pm$ 1.23                 | 20.8 $\pm$ 1.9   | 10.5 $\pm$ 0.873   |
| <b>100</b>                                           | 3149 $\pm$ 19.5                 | 109.7 $\pm$ 51.8 | 130.1 $\pm$ 46.9   |
|                                                      | 3383 $\pm$ 9.67                 | 213.8 $\pm$ 16.9 | 125.7 $\pm$ 11.8   |
|                                                      | 3698 $\pm$ 1.67                 | 18.1 $\pm$ 1.2   | 10.1 $\pm$ 1.14    |
| <b>450</b>                                           | 3208 $\pm$ 21                   | 243.9 $\pm$ 242  | 116.6 $\pm$ 52.4   |
|                                                      | 3353 $\pm$ 16                   | 155.2 $\pm$ 253  | 106.8 $\pm$ 63.1   |
|                                                      | 3665 $\pm$ 10.8                 | 61.5 $\pm$ 17.6  | 47.5 $\pm$ 9.93    |
| <b>890</b>                                           | 3208 $\pm$ 18.3                 | 219.4 $\pm$ 211  | 107.2 $\pm$ 45.9   |
|                                                      | 3352 $\pm$ 14.8                 | 181.8 $\pm$ 247  | 111.4 $\pm$ 56.5   |
|                                                      | 3671 $\pm$ 10.1                 | 55.6 $\pm$ 15.2  | 43.32 $\pm$ 9.26   |

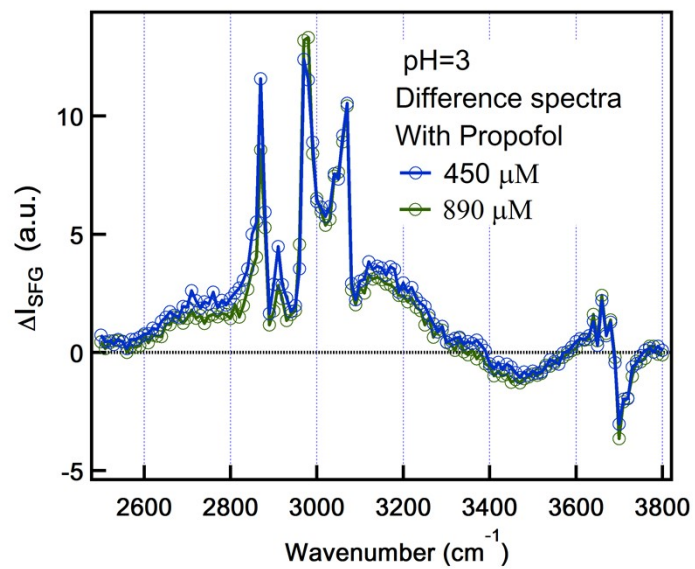

**Figure S4:** The difference VSFG spectra (VSFG spectra of propofol at different concentrations- VSFG spectra of air/water) for the different concentrations of propofol at pH=3.

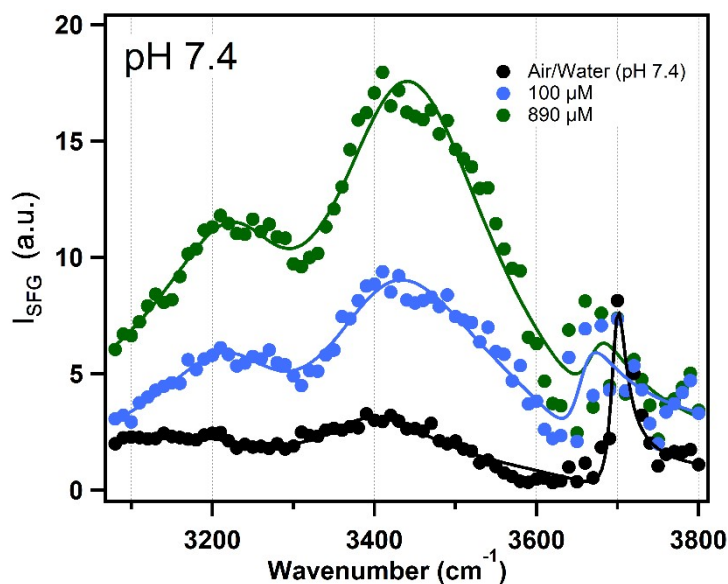

**Figure S5:** SSP polarized SFG spectra of water OH region at different concentrations of propofol at pH 7.4 along with fitted line (solid) using Lorentzian equation.

**Table S3:** The peak center, amplitude (A), and peak width ( $\Gamma$ ) values of SFG spectra different concentrations of propofol at pH 5.6, obtained from the fittings with equation 3.

| Sample                                               | Peak Center (cm <sup>-1</sup> ) | Amplitude (A)     | Width ( $\Gamma$ ) |
|------------------------------------------------------|---------------------------------|-------------------|--------------------|
| <b><u>Propofol (<math>\mu</math>M) at pH 7.4</u></b> |                                 |                   |                    |
| <b>0</b>                                             | 3140 $\pm$ 22                   | 242.44 $\pm$ 131  | 185.37 $\pm$ 77.4  |
|                                                      | 3384.3 $\pm$ 10.6               | 85.568 $\pm$ 41.8 | 88.407 $\pm$ 23.6  |
|                                                      | 3698.1 $\pm$ 1.3                | 24.213 $\pm$ 2.52 | 10.934 $\pm$ 0.965 |
| <b>100</b>                                           | 3229.9 $\pm$ 28.1               | 181.75 $\pm$ 203  | 98.702 $\pm$ 49.1  |
|                                                      | 3408.4 $\pm$ 18.3               | 428.81 $\pm$ 239  | 128.94 $\pm$ 25.2  |
|                                                      | 3655.2 $\pm$ 6.13               | 22.852 $\pm$ 8.66 | 25.346 $\pm$ 9.01  |
| <b>890</b>                                           | 3241.2 $\pm$ 13.1               | 183.97 $\pm$ 30.3 | 99.021 $\pm$ 7.52  |
|                                                      | 3437.1 $\pm$ 10.3               | 605.14 $\pm$ 57.7 | 132.01 $\pm$ 8.85  |
|                                                      | 3670.5 $\pm$ 9.65               | 17.454 $\pm$ 12.2 | 27.4 $\pm$ 16.9    |

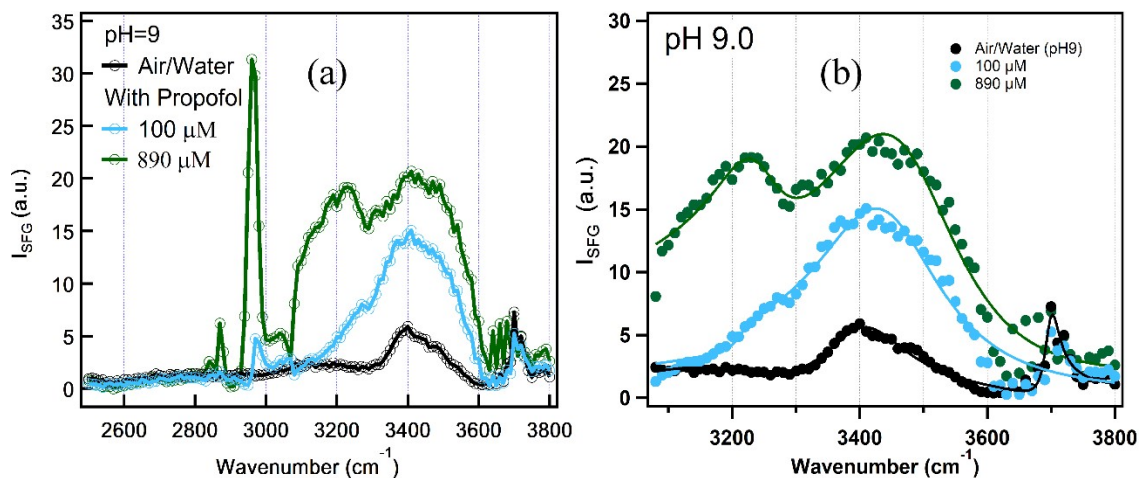

**Figure S6:** (a) SSP polarized SFG spectra at different concentrations of propofol at pH 9.0, and (b) fitted line (solid) of water OH region using Lorentzian equation.

**Table S4:** The peak center, amplitude (A), and peak width ( $\Gamma$ ) values of SFG spectra different concentrations of propofol at pH 9.0, obtained from the fittings with equation 3.

| Sample                                                      | Peak Center ( $\text{cm}^{-1}$ ) | Amplitude (A)    | Width ( $\Gamma$ ) |
|-------------------------------------------------------------|----------------------------------|------------------|--------------------|
| <b><u>Propofol (<math>\mu\text{M}</math>) at pH 9.0</u></b> |                                  |                  |                    |
| <b>0</b>                                                    | $3147 \pm 19.9$                  | $169.2 \pm 77.2$ | $152.4 \pm 51.7$   |
|                                                             | $3399 \pm 5.64$                  | $146.0 \pm 27.8$ | $81.2 \pm 8.83$    |
|                                                             | $3698 \pm 1.68$                  | $27.3 \pm 3.1$   | $14.0 \pm 1.48$    |
| <b>100</b>                                                  | $3282 \pm 14.6$                  | $216.9 \pm 134$  | $148.8 \pm 42.3$   |
|                                                             | $3476 \pm 6.19$                  | $573.7 \pm 37.4$ | $120.2 \pm 8.42$   |
|                                                             | $3698 \pm 2.1$                   | $15.6 \pm 1.44$  | $8.5 \pm 1.07$     |
| <b>890</b>                                                  | $3245 \pm 8.31$                  | $66.3 \pm 36.3$  | $64.8 \pm 21.7$    |
|                                                             | $3476 \pm 13.6$                  | $449.5 \pm 55.7$ | $144.1 \pm 11.9$   |

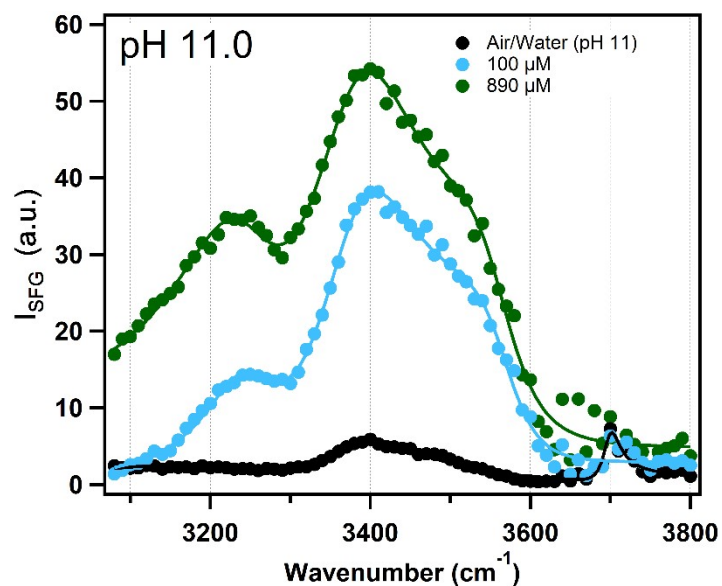

**Figure S7:** SSP polarized SFG spectra of water OH region at different concentrations of propofol at pH 11.0 along with fitted line (solid) using Lorentzian equation.

**Table S5:** The peak center, amplitude (A), and peak width ( $\Gamma$ ) values of SFG spectra different concentrations of propofol at pH 11.0, obtained from the fittings with equation 3.

| Sample                                                | Peak Center (cm <sup>-1</sup> ) | Amplitude (A)     | Width ( $\Gamma$ ) |
|-------------------------------------------------------|---------------------------------|-------------------|--------------------|
| <b><u>Propofol (<math>\mu</math>M) at pH 11.0</u></b> |                                 |                   |                    |
| <b>0</b>                                              | 3125 $\pm$ 19.1                 | 121.42 $\pm$ 45.9 | 110.2 $\pm$ 39.1   |
|                                                       | 3410 $\pm$ 5.2                  | 150.05 $\pm$ 23.7 | 78.7 $\pm$ 6.77    |
|                                                       | 3698 $\pm$ 1.6                  | 24.345 $\pm$ 2.76 | 12.8 $\pm$ 1.42    |
| <b>100</b>                                            | 3245 $\pm$ 10                   | 173.56 $\pm$ 42.6 | 61.6 $\pm$ 8.59    |
|                                                       | 3376 $\pm$ 3.2                  | 488.3 $\pm$ 56.4  | 82.2 $\pm$ 5.4     |
|                                                       | 3564 $\pm$ 4.3                  | 153.7 $\pm$ 19.1  | 59.1 $\pm$ 5.16    |
| <b>890</b>                                            | 3245 $\pm$ 6.5                  | 328.0 $\pm$ 143   | 82.7 $\pm$ 15      |
|                                                       | 3377 $\pm$ 5.5                  | 789.1 $\pm$ 163   | 93.9 $\pm$ 8.77    |
|                                                       | 3557 $\pm$ 6.2                  | 216.6 $\pm$ 39.5  | 65.8 $\pm$ 6.63    |



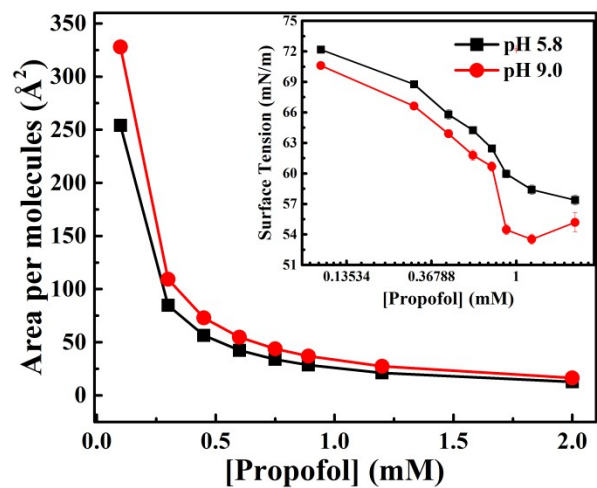

**Figure S8:** Concentration-dependent Area per molecule (Å<sup>2</sup>) of propofol at different pHs. Inset shows the concentration-dependent change in surface tension (mN/m) of propofol at different pHs.
